# Supplementary material for: Bromine-mediated strategy endows efficient electrochemical oxidation of amine to nitrile
Source: Royal Society of Chemistry journal article supplement (doi:10.1039/d3cc05861a), 2024-01-01
Supplement: d3cc05861a1.pdf [file d3cc05861a1.pdf]

# Supporting Information

## **Bromine-mediated Strategy Endows Efficient Electrochemical Oxidation of Amine to Nitrile**

Yuchi Zhang,<sup>\*a</sup> Jiyang Zhao,<sup>a</sup> Jiongjia Cheng,<sup>a</sup> Xiaofeng Wang,<sup>a</sup> Haiying Wang,<sup>a</sup>  
Yang Shao,<sup>a</sup> Xiaoxia Mao,<sup>c</sup> Xin He<sup>\*b</sup>

---

<sup>a</sup>*School of Environmental Science, Nanjing Xiaozhuang University, Nanjing, Jiangsu 211171, P. R. China*

<sup>b</sup>*College of Materials Science and Engineering, Shenzhen University, Shenzhen, 518060, P. R. China*

<sup>c</sup>*Key Laboratory of Aqueous Environment Protection and Pollution Control of Yangtze River in Anhui of Anhui Provincial Education Department, College of Resources and Environment, Anqing Normal University, Anqing 246011, P. R. China*

## ***Experimental Section***

### ***Materials and Methods***

No further purification was performed on the reagents and materials obtained from suppliers unless otherwise specified. The following chemicals were procured from Sinopharm Chemical Reagent Co., Ltd with a purity of 99%: NaBr,  $\text{CoSO}_4 \cdot 7\text{H}_2\text{O}$ ,  $\text{CO}(\text{NH}_2)_2$  (urea), *N,N*-dimethylformamide (DMF), ethylene glycol (EG),  $\text{CH}_3\text{OH}$  and  $\text{C}_2\text{H}_5\text{OH}$ . Sigma Aldrich supplied the amine substrates. GaossUnion Optoelectronics Technology Co., Ltd provided the electrodes (Pt sheet, glassy carbon, reference electrode). Graphite felt (GF) was acquired from Beijing Jinglong Special Carbon Graphite Factory.

FEI Nova NanoSEM NPE218 was employed for the SEM images. The conversion and selectivity of the substrates (Figure S9-S15) and product were analyzed by GC-MS-QP 2010 SE (SHIMADZU). Electrochemical testing was conducted using an electrochemical workstation CHI760E from Shanghai Chenhua Instrument Co., Ltd.

### ***Metal sulfide synthesis and characterization***

A one-step solvothermal method was used to synthesize  $\text{CoS}_2/\text{CoS}$ , heterojunction nanoparticles<sup>29</sup>. 2 mmol  $\text{CoSO}_4 \cdot 7\text{H}_2\text{O}$ , 10 mmol urea, and 25 mmol sublimated sulfur were dissolved in a 70 mL mixture of 30 mL ethylene glycol (EG) and 40 mL DMF. The precursor solution was stirred for 1 h and then poured into a 100 mL Teflon-lined autoclave. The autoclave was heated to 180 °C, kept for 12 h, and cooled to room temperature followed by centrifuging at 7000 rpm for 5 minutes. The samples were rinsed several times with ethanol and deionized water (DI) before being dried under vacuum at 60 °C for 12 h.

### ***In situ generated metal sulfide catalysts on GF and electrode preparation***

The precursor solution of CoS<sub>2</sub>/CoS was prepared as described above. The modified GF was obtained by immersing the purchased GF (1 cm × 1 cm × 3 mm) in 6 M H<sub>2</sub>SO<sub>4</sub> for 12 h, then washing it with DI until the pH was neutral. The modified GF was then transferred into precursor solutions of different metal sulfides for 12 h at 180 °C. After cooling, the GF loaded with metal sulfides was cleaned several times in an ultrasonic cleaner with water until no particles were observed in the washing solution, and then they were dried under vacuum for 12 h at 60 °C to get the final CoS<sub>2</sub>/CoS@GF electrode. The mass loading of CoS<sub>2</sub>/CoS on the GF was 1.05 mg cm<sup>-2</sup>.

### ***Br<sup>-</sup>/Br<sub>2</sub> redox reaction evaluated by Linear Sweep Voltammetry (LSV)***

The catalyst ink was prepared by dispersing 10 mg of CoS<sub>2</sub>/CoS in a mixed solution containing 750 µL of H<sub>2</sub>O, 200 µL of C<sub>2</sub>H<sub>5</sub>OH, and 50 µL of Nafion. The ink was then uniformly dropped onto a glassy carbon electrode and allowed to dry naturally to prepare the working electrode. Platinum and saturated calomel electrodes were used as the counter and reference electrodes, respectively. 0.1 M NaNO<sub>3</sub> was used as the supporting electrolyte to enhance the solution's conductivity. The electrolyte composition for the Br<sup>-</sup>/Br<sub>2</sub> redox reaction was 5 mM NaBr + 0.1 M NaNO<sub>3</sub>. The scan rate was 50 mV s<sup>-1</sup>.

### ***Electrochemical synthesis of nitrile from the amine***

A typical procedure was as follows: A methanol (25 mL) solution of octylamine (259 mg, 2 mmol) and NaBr (206 mg, 2 mmol) was put in a conventional single cell with CoS<sub>2</sub>/CoS@GF (1 cm × 1 cm) as the anode and GF as the cathode (1 cm × 1 cm). A constant current of 60 mA was applied to the cell for 4 h. GC-MS was used to examine the conversion and selectivity of the product using dodecane as internal standard. Before the recycling test, the working electrode was rinsed several times with ethanol and DI water.

### ***The analysis of the product***

A sample (500  $\mu\text{L}$ ) of the reaction solution was mixed with dichloromethane (500  $\mu\text{L}$ ), DI (500  $\mu\text{L}$ ), and dodecane (0.2  $\mu\text{L}$ ) for extraction, and then dehydrated with anhydrous magnesium sulfate. The extract was subjected to GC-MS to identify the products and quantify the conversion and selectivity.

The conversion (%) of amines and selectivity (%) of nitriles were calculated using the equations below.

$$\textbf{Conversion (\%)} = \frac{\text{Mole of amine consumed}}{\text{Mole of initial amine}} \times 100\%$$

$$\textbf{Selectivity (\%)} = \frac{\text{Mole of formed nitrile}}{\text{Mole of consumed amine}} \times 100\%$$

The Faradaic efficiency ( $FE$ ) was computed as follows:

$$\textbf{FE (\%)} = \frac{N_i \times n \times F}{Q} \times 100\%$$

where  $N_i$  is the number of moles for the specific product (mole);  $n$  is the number of electrons exchanged for product formation, which is  $4e^-$  in this reaction;  $F$  is the Faradaic constant of  $96487 \text{ C mol}^{-1}$ ,  $Q$  is the passed charge.

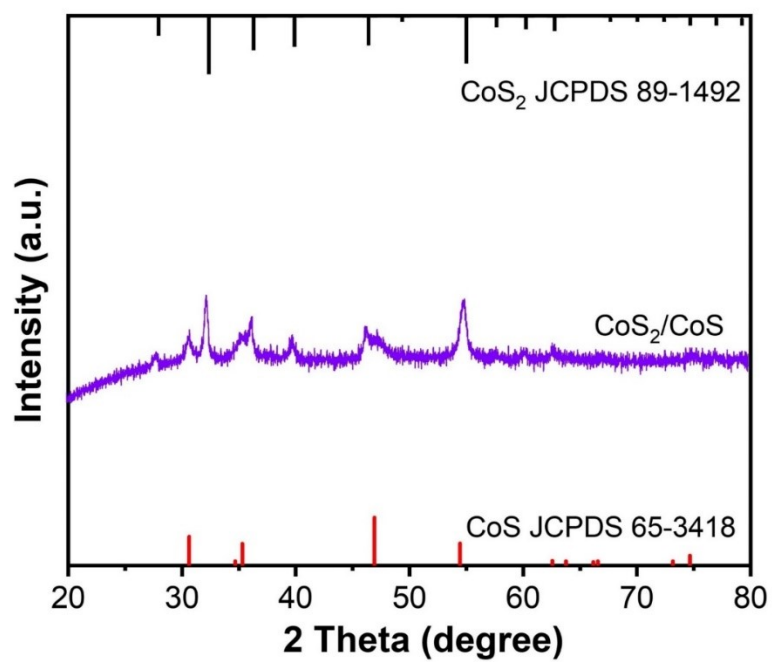

**Figure S1** PXRD patterns of the prepared CoS<sub>2</sub>/CoS heterojunction.

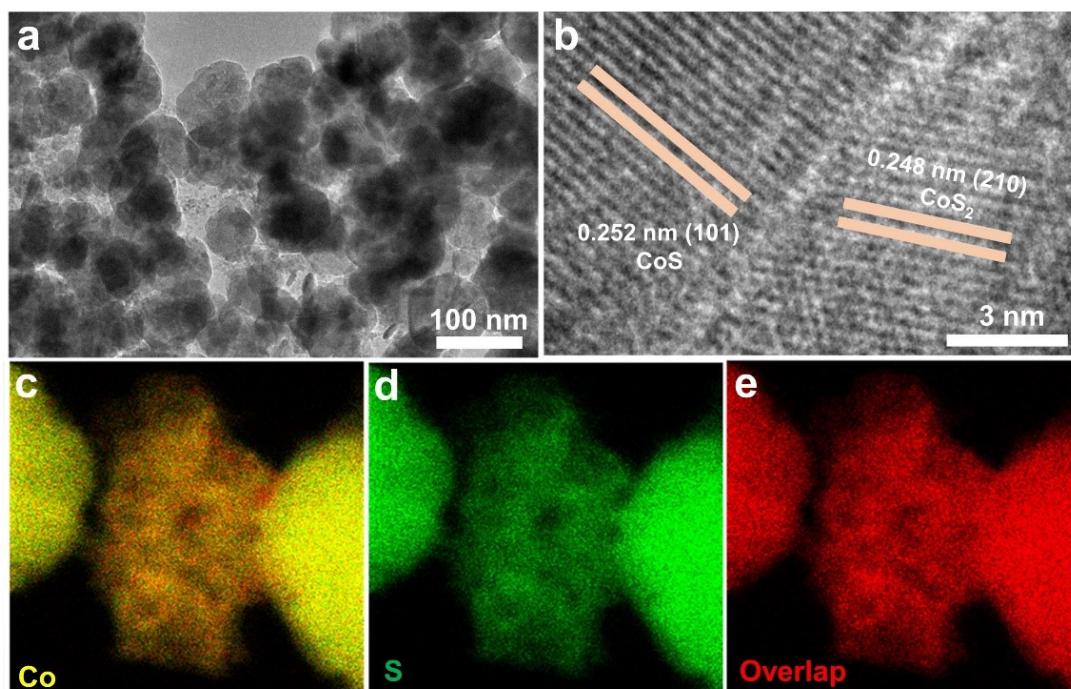

**Figure S2** (a) TEM image and (b) High-resolution TEM image of CoS<sub>2</sub>/CoS heterojunction, (c-e) elemental mappings of Co and S.

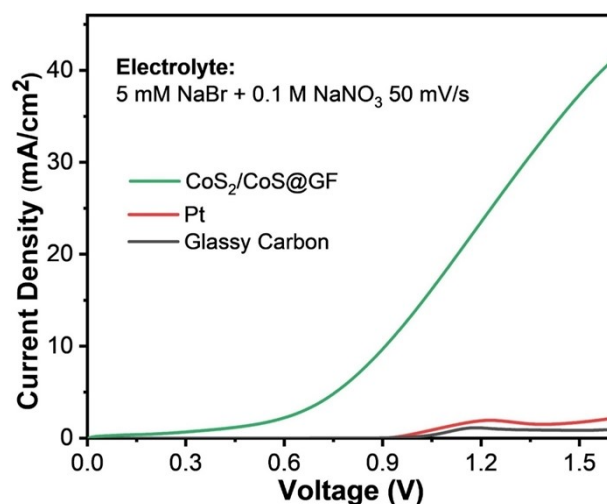

**Figure S3** LSV curves of  $\text{Br}^-$  oxidation ability of the working electrodes:  $\text{CoS}_2/\text{CoS}$  heterojunction, glassy carbon, and platinum.

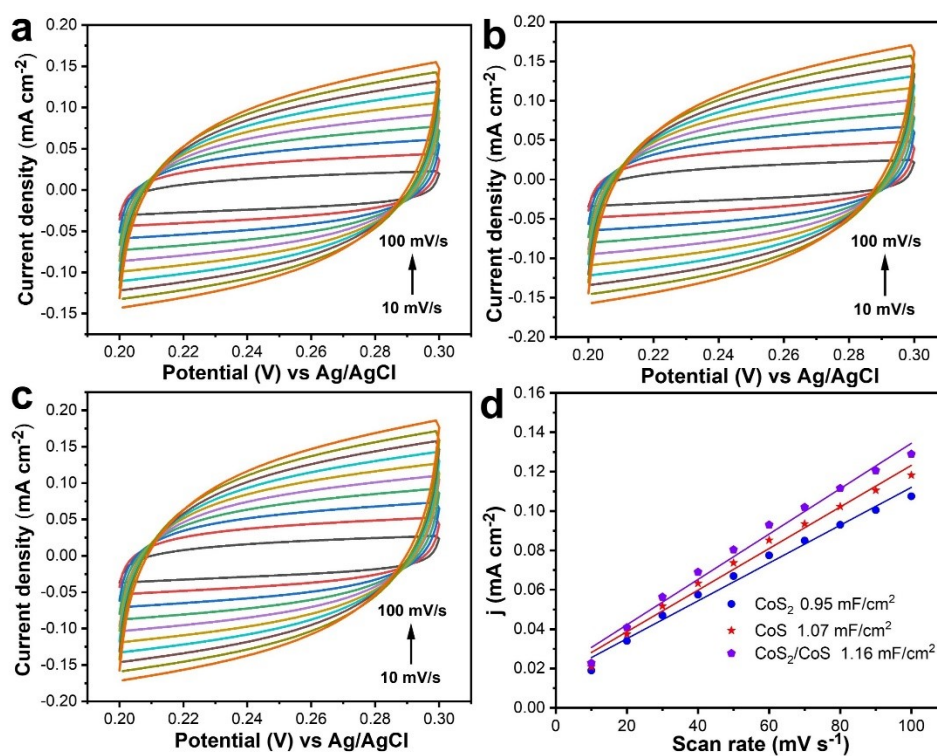

**Figure S4** The cyclic voltammetry spectra for (a)  $\text{CoS}_2$  (b)  $\text{CoS}$ , (c)  $\text{CoS}_2/\text{CoS}$  in 0.5 M  $\text{NaBr}$  aqueous solution in the potential range of 0.2 -0.3 V. (d) Capacitive currents at 0.25 V (vs.  $\text{Ag}/\text{AgCl}$ ) of  $\text{CoS}_2$ ,  $\text{CoS}$ ,  $\text{CoS}_2/\text{CoS}$  in 0.5 M  $\text{NaBr}$  buffer solution. Counter electrode: Platinum. Reference electrode:  $\text{Ag}/\text{AgCl}$ . Scan rate: 10-100  $\text{mV/s}$ .

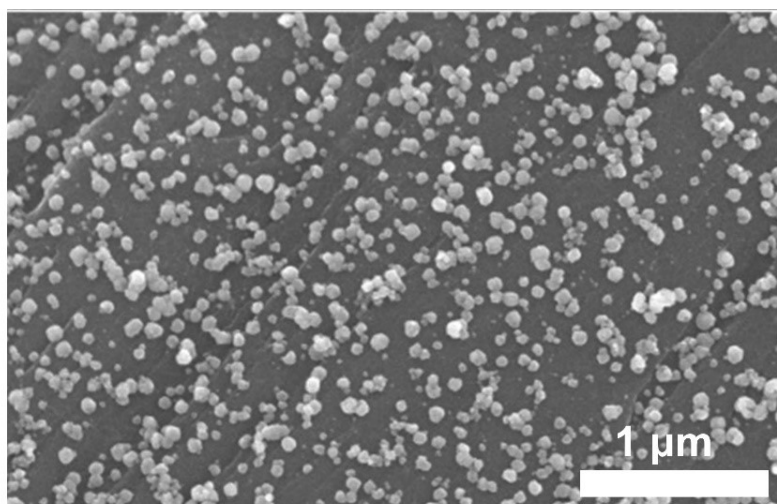

**Figure S5** (a) High-resolution SEM image of  $\text{CoS}_2/\text{CoS}@GF$  electrode.

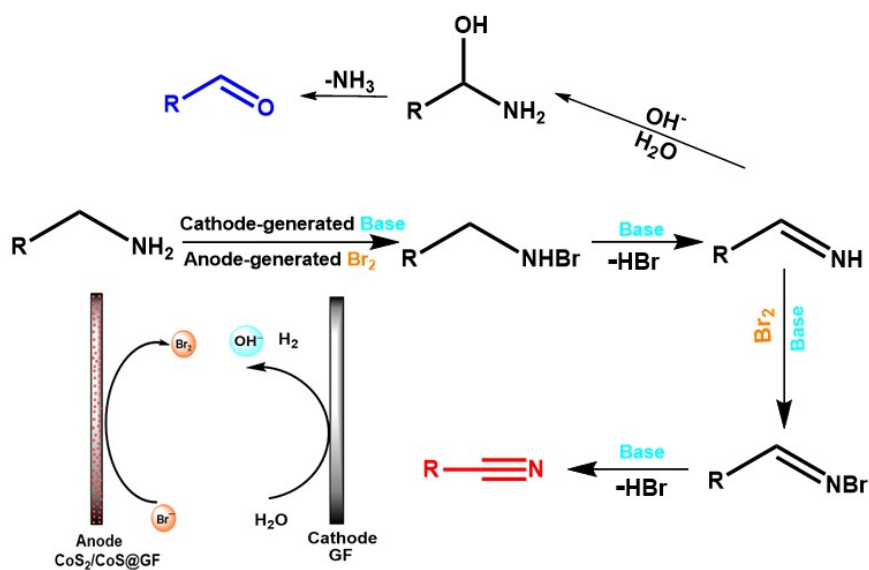

**Figure S6** Reaction pathways of electrochemical conversion of amines to nitriles mediated by  $\text{Br}^-/\text{Br}_2$  redox mediator.

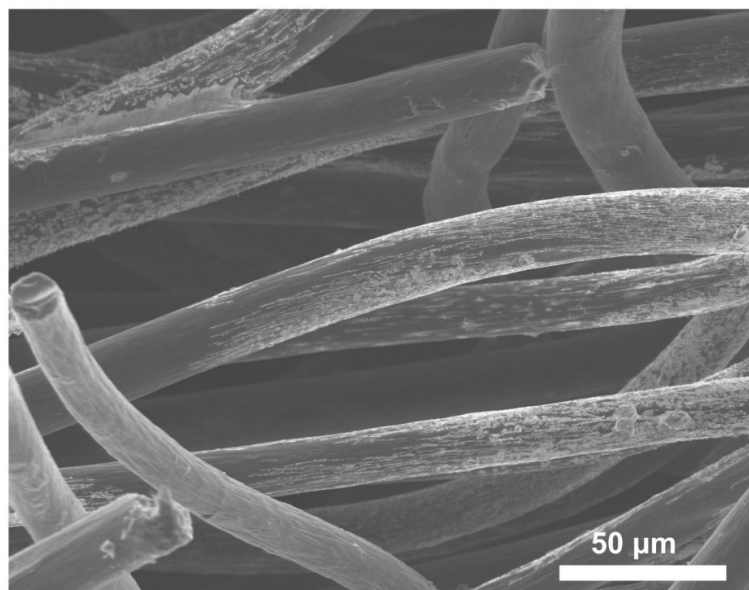

**Figure S7** SEM images of the prepared  $\text{CoS}_2/\text{CoS}@GF$  heterojunction electrode after 5 cycles of the electrochemical reaction.

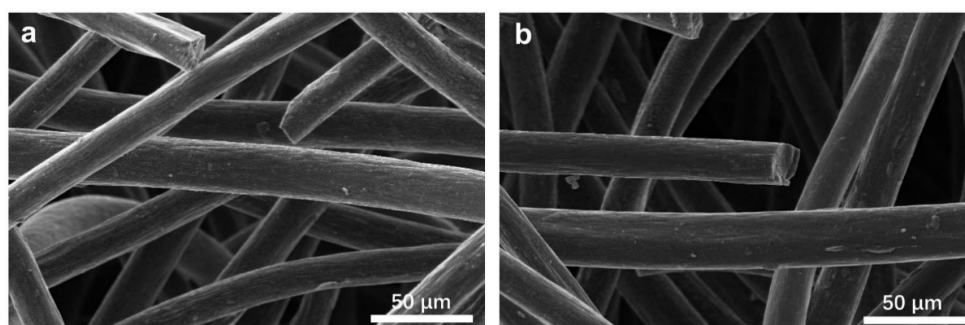

**Figure S8** SEM images of the GF cathode (a) before the experiment; (b) after 5 cycles of the electrochemical reaction.

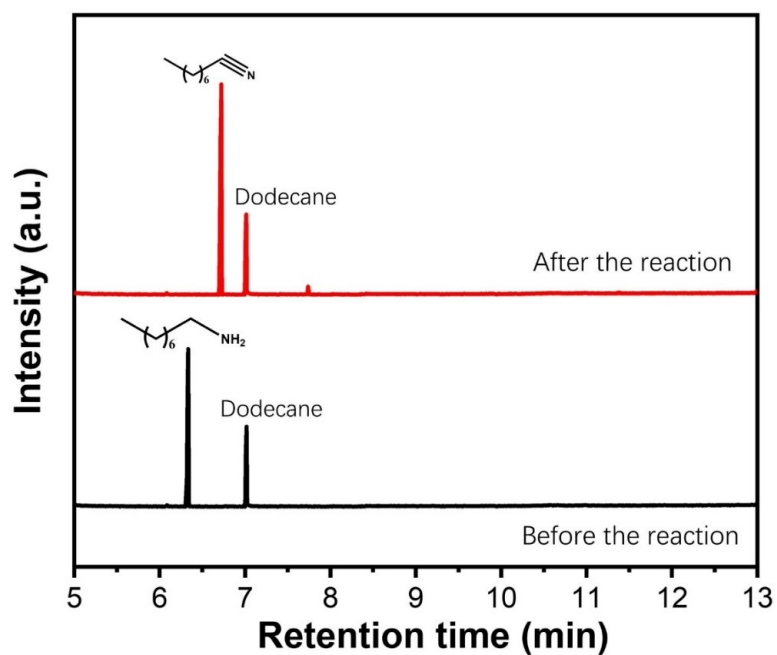

**Figure S9** Gas chromatography-mass spectrometry (GC-MS) spectrum of electrochemical oxidation of octylamine to octanenitrile under 60 mA for 4 h using  $\text{CoS}_2/\text{CoS}@GF$  as the anode and GF as the cathode. Dodecane was used as the internal standard for quantification.

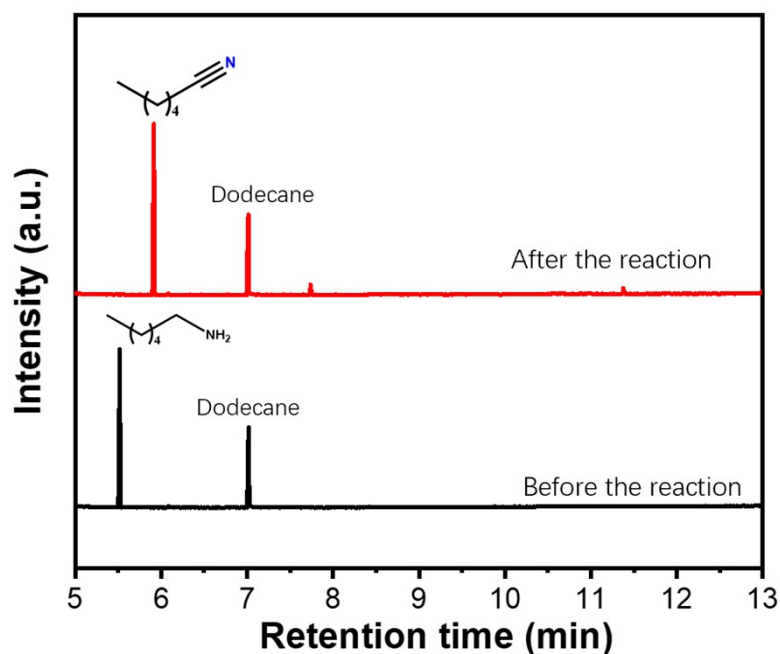

**Figure S10** Gas chromatography-mass spectrometry (GC-MS) spectrum of electrochemical oxidation of hexanamine to hexanenitrile under 60 mA for 4 h using  $\text{CoS}_2/\text{CoS}@GF$  as the anode and GF as the cathode. Dodecane was used as the internal standard for quantification.

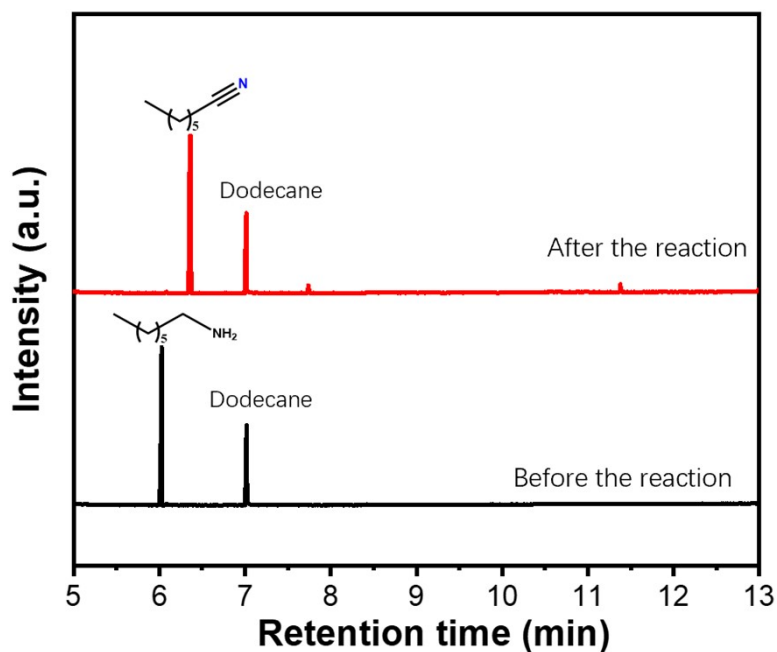

**Figure S11** Gas chromatography-mass spectrometry (GC-MS) spectrum of electrochemical oxidation of heptanamine to heptanenitrile under 60 mA for 4 h using  $\text{CoS}_2/\text{CoS}@GF$  as the anode and GF as the cathode. Dodecane was used as the internal standard for quantification.

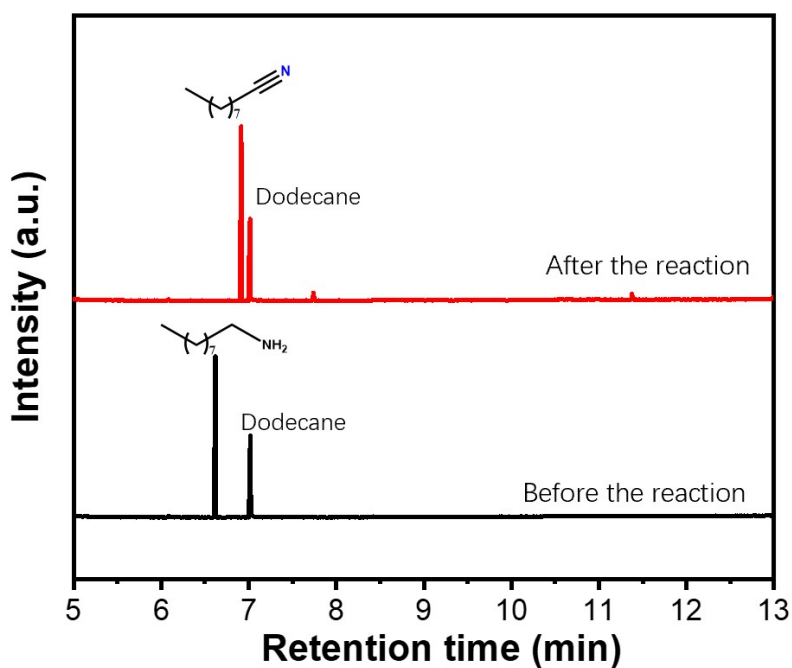

**Figure S12** Gas chromatography-mass spectrometry (GC-MS) spectrum of electrochemical oxidation of nonylamine to nonanenitrile under 60 mA for 4 h using  $\text{CoS}_2/\text{CoS}@GF$  as the anode and GF as the cathode. Dodecane was used as the internal standard for quantification.

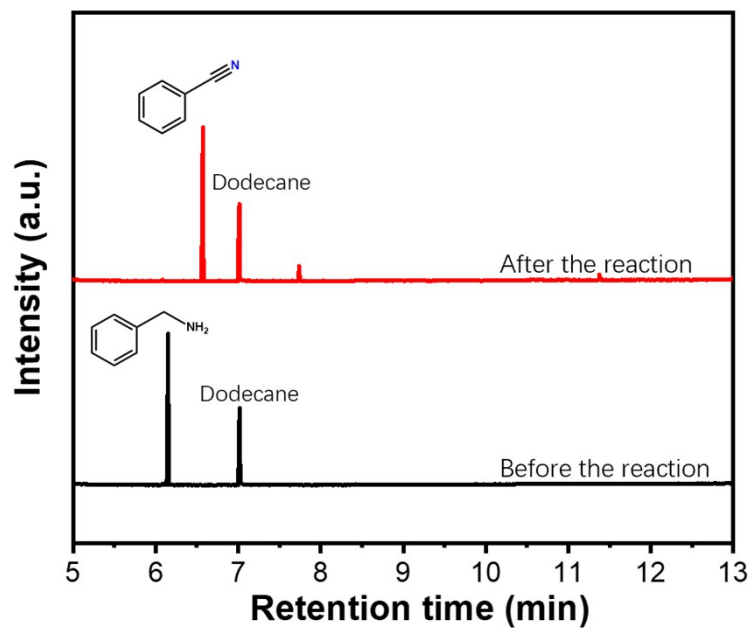

**Figure S13** Gas chromatography-mass spectrometry (GC-MS) spectrum of electrochemical oxidation of benzylamine to benzonitrile under 60 mA for 4 h using  $\text{CoS}_2/\text{CoS}@GF$  as the anode and GF as the cathode. Dodecane was used as the internal standard for quantification.

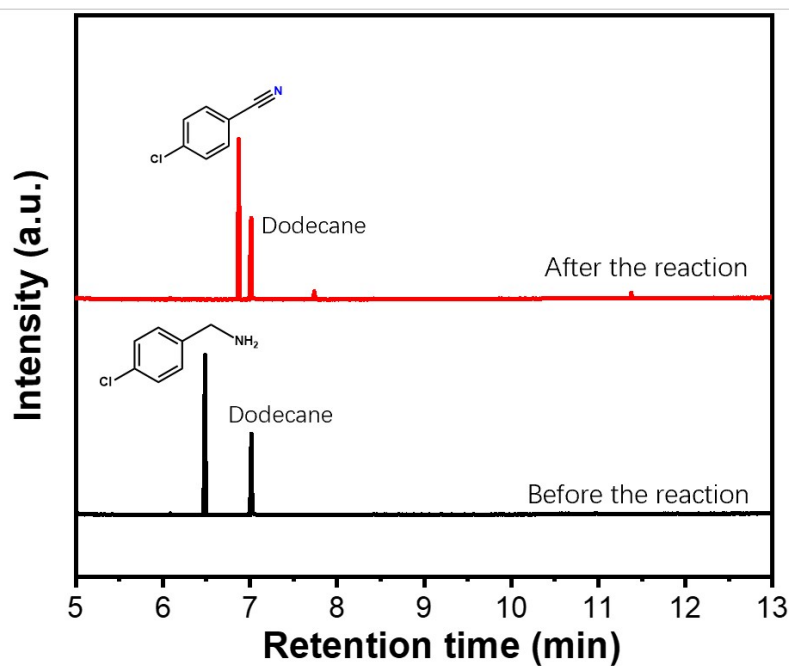

**Figure S14** Gas chromatography-mass spectrometry (GC-MS) spectrum of electrochemical oxidation of 4-chlorobenzylamine to 4-chlorobenzonitrile under 60 mA for 4 h using  $\text{CoS}_2/\text{CoS}@GF$  as the anode and GF as the cathode. Dodecane was used as the internal standard for quantification.

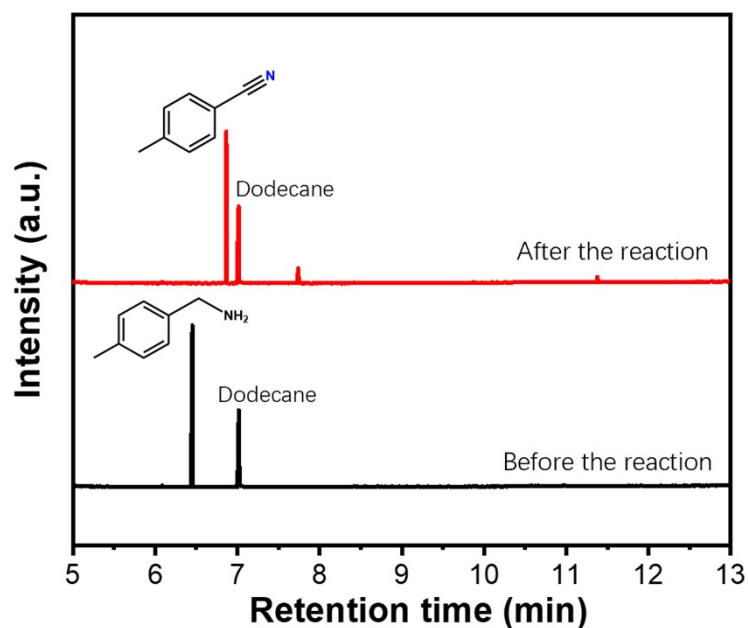

**Figure S15** Gas chromatography-mass spectrometry (GC-MS) spectrum of electrochemical oxidation of 4-methylbenzylamine to p-tolunitrile under 60 mA for 4 h using CoS<sub>2</sub>/CoS@GF as the anode and GF as the cathode. Dodecane was used as the internal standard for quantification.

**Table S1** The effect of temperature on the yield of the nitrile<sup>[a]</sup>

| Temperature (°C) | Conversion <sup>[b]</sup> (%) | Selectivity <sup>[b]</sup> (%) | FE (%) |
|------------------|-------------------------------|--------------------------------|--------|
| 10               | 100                           | 97(4)                          | 86     |
| 20               | 100                           | 98(3)                          | 87     |
| 30               | 100                           | 98(3)                          | 87     |
| 40               | 100                           | 91(2)                          | 81     |

<sup>[a]</sup>Undivided cell: octylamine: 2 mmol, a constant current of 60 mA at 10, 20, 30, 40 °C for 4 h, anode: CoS<sub>2</sub>/CoS@GF, cathode: GF. <sup>[b]</sup>Determined by GC-MS integrals. Errors are in parentheses.

**Table S2** Yield of nitrile and FE using CoS<sub>2</sub>/CoS@GF electrode after five consecutive cycles <sup>[a]</sup>.

| <b>Current Densities</b>             | <b>Cycle</b> | <b>Conversion<sup>[b]</sup></b> | <b>Selectivity<sup>[b]</sup></b> | <b>FE</b>  |
|--------------------------------------|--------------|---------------------------------|----------------------------------|------------|
| <b>(mA cm<sup>-2</sup>)/Time (h)</b> |              | <b>(%)</b>                      | <b>(%)</b>                       | <b>(%)</b> |
| 60/4                                 | 1            | 100                             | 98                               | 87         |
| 60/4                                 | 2            | 100                             | 97                               | 87         |
| 60/4                                 | 3            | 100                             | 97                               | 87         |
| 60/4                                 | 4            | 100                             | 97                               | 86         |
| 60/4                                 | 5            | 100                             | 95                               | 85         |

<sup>[a]</sup>Undivided cell: octylamine: 2 mmol, NaBr: 2 mmol, constant current of 60 mA for 4 h at RT, anode: CoS<sub>2</sub>/CoS@GF, cathode: GF. <sup>[b]</sup>Determined by GC-MS integrals.

**Table S3** Broaden the substrate's scope for Br<sup>-</sup>/Br<sub>2</sub> mediated electrochemical oxidation of amines to nitriles.

| Entry | Substrate                                                                           | Conv. <sup>[b]</sup> (%) | Select. <sup>[b]</sup> (%)                                                          | Yield (%) | FE (%) |
|-------|-------------------------------------------------------------------------------------|--------------------------|-------------------------------------------------------------------------------------|-----------|--------|
| 1     | 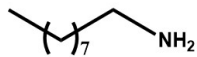   | 100                      | 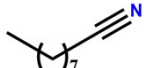   | 95        | 85     |
|       | <b>1a</b>                                                                           |                          | <b>2a (95)</b>                                                                      |           |        |
| 2     | 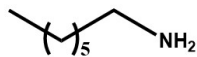   | 97                       | 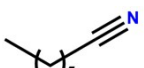   | 92        | 82     |
|       | <b>1b</b>                                                                           |                          | <b>2b (95)</b>                                                                      |           |        |
| 3     | 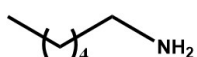   | 99                       | 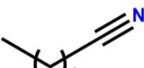   | 90        | 81     |
|       | <b>1c</b>                                                                           |                          | <b>2c (89)</b>                                                                      |           |        |
| 4     | 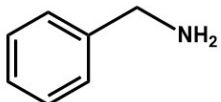  | 100                      | 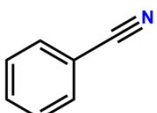  | 83        | 74     |
|       | <b>1d</b>                                                                           |                          | <b>2d (83)</b>                                                                      |           |        |
| 5     | 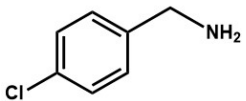 | 94                       | 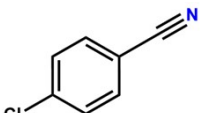 | 83        | 74     |
|       | <b>1e</b>                                                                           |                          | <b>2e (92)</b>                                                                      |           |        |
| 6     | 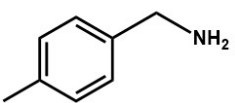 | 97                       | 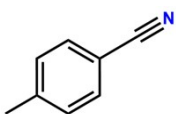 | 89        | 80     |
|       | <b>1f</b>                                                                           |                          | <b>2f (88)</b>                                                                      |           |        |

<sup>[a]</sup>Undivided cell: amine substrate: 2 mmol, NaBr: 2 mmol, a constant current of 60 mA at RT for 4 h, anode: CoS<sub>2</sub>/CoS@GF, cathode: GF. <sup>[b]</sup>Determined by GC-MS integrals.
